# Supplementary material for: Reinforcement Learning Algorithms and Applications in Healthcare and Robotics: A Comprehensive and Systematic Review
Source: MDPI journal article supplement (doi:10.3390/s24082461), 2024-04-11
Supplement: s1 [file s1]

# Supplementary material for Reinforcement Learning Algorithms and Applications in Healthcare and Robotics: A Comprehensive and Systematic Review

Mokhaled N. A. Al-Hamadani <sup>1,2,3,\*</sup>, Mohammed A. Fadhel <sup>4</sup>, Laith Alzubaidi <sup>4,5,6</sup> and Harangi Balazs <sup>1</sup>

<sup>1</sup> Department of Data Science and Visualization, Faculty of Informatics, University of Debrecen, H-4032 Debrecen, Hungary; harangi.balazs@inf.unideb.hu

<sup>2</sup> Doctoral School of Informatics, University of Debrecen, H-4032 Debrecen, Hungary

<sup>3</sup> Department of Electronic Techniques, Technical Institute/Alhawija, Northern Technical University, Adan, 36001 Kirkuk, Iraq

<sup>4</sup> Research and Development Department, Akunah Company, Brisbane, QLD 4120, Australia; mohammed.a.fadhel@uoitc.edu.iq (M.A.F.); l.alzubaidi@qut.edu.au (L.A.)

<sup>5</sup> School of Mechanical, Medical, and Process Engineering, Queensland University of Technology, Brisbane, QLD 4000, Australia

<sup>6</sup> Centre for Data Science, Queensland University of Technology, Brisbane, QLD 4000, Australia

\* Correspondence: alhamadani.mokhaled@inf.unideb.hu

This document includes all the framework figures that have been used in Table 5. These figures are high-resolution and more readable now.

## 1. Supplementary figures

The framework figure for reference [68] is shown below:

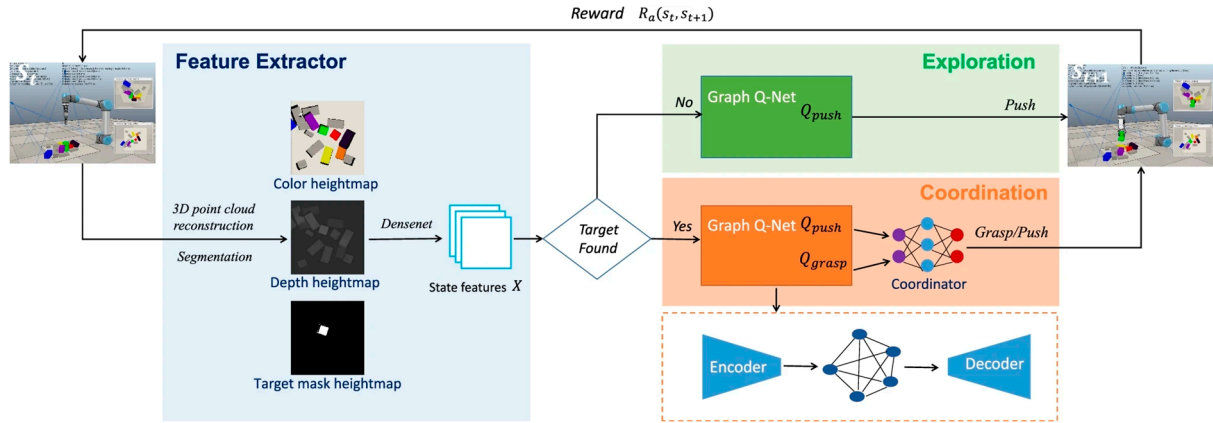

The framework figure for reference [69] is shown below:

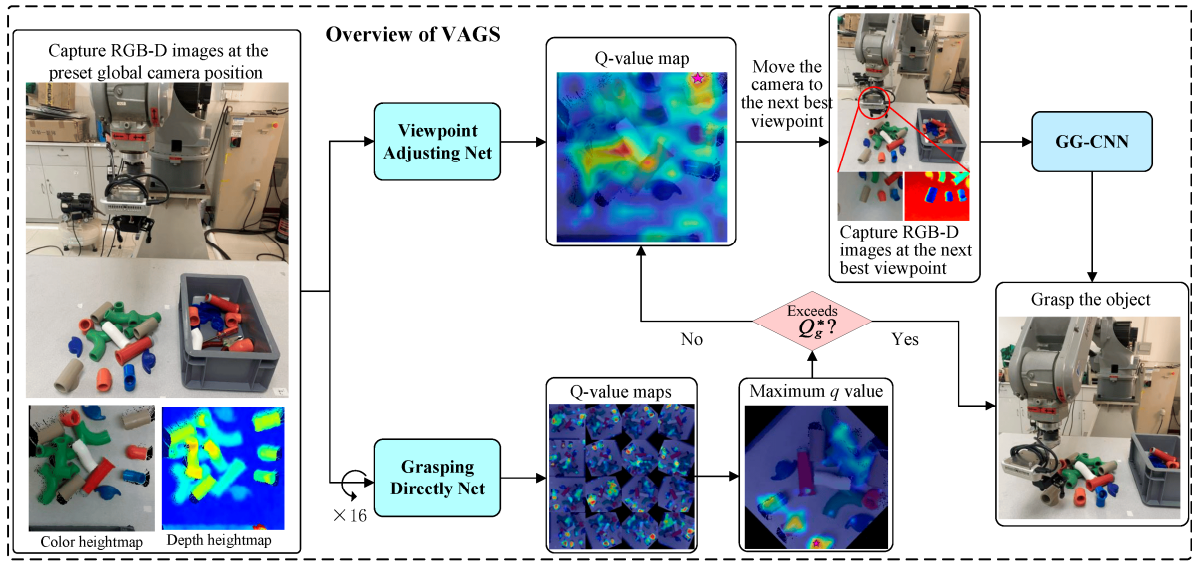

The framework figure for reference [70] is shown below:

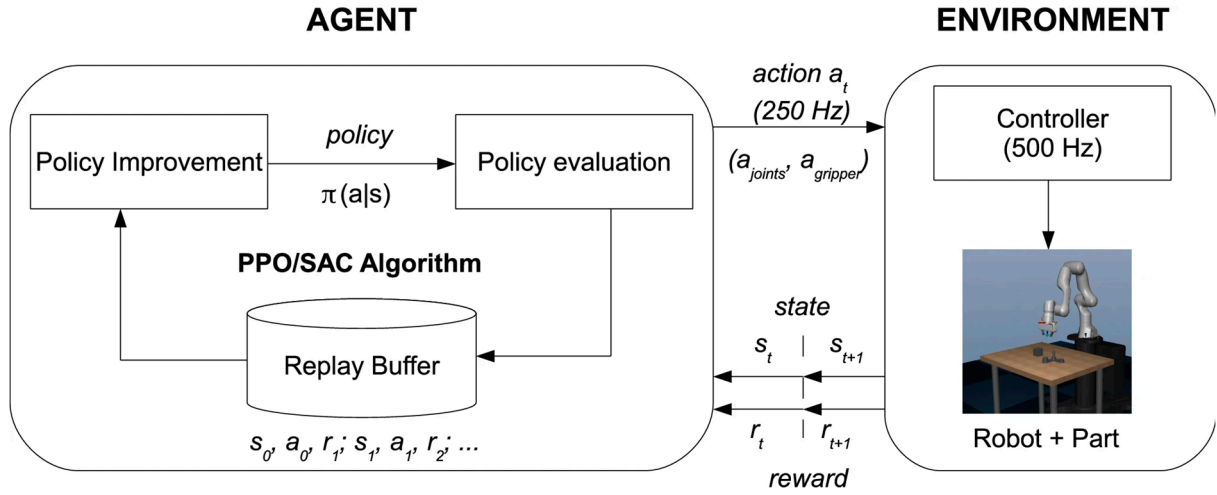

The framework figure for reference [71] is shown below:

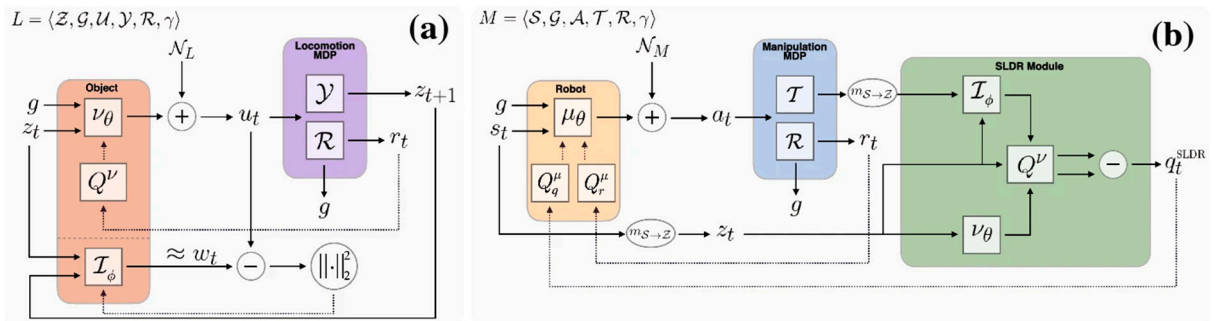

The framework figure for reference [72] is shown below:

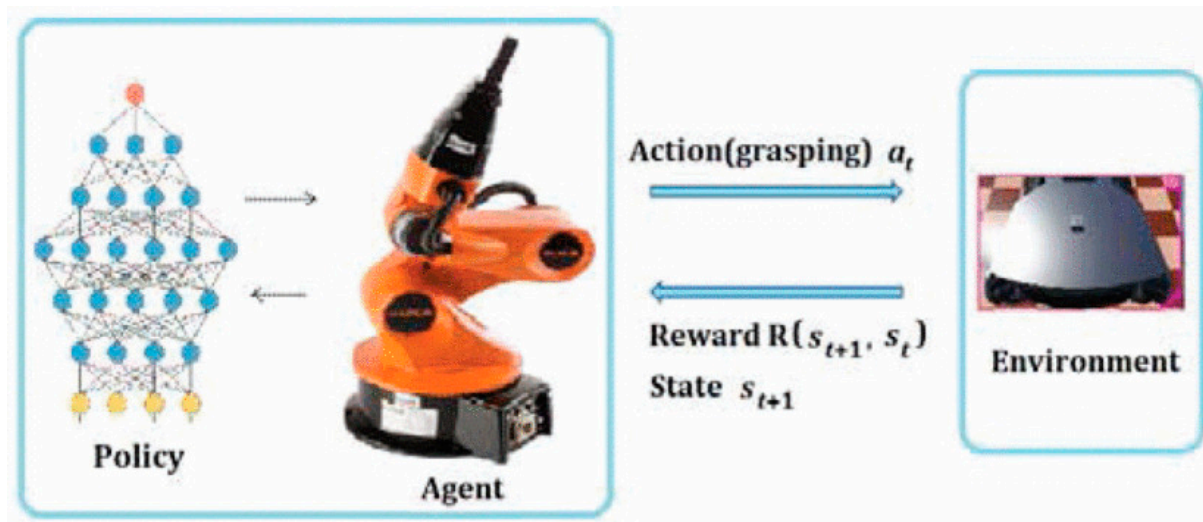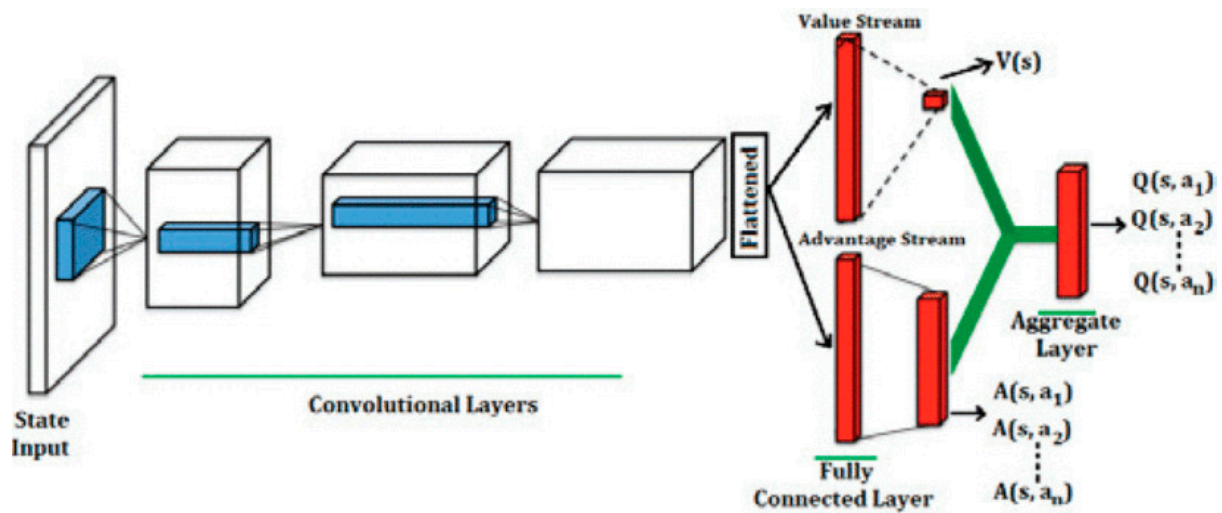

The framework figure for reference [73] is shown below:

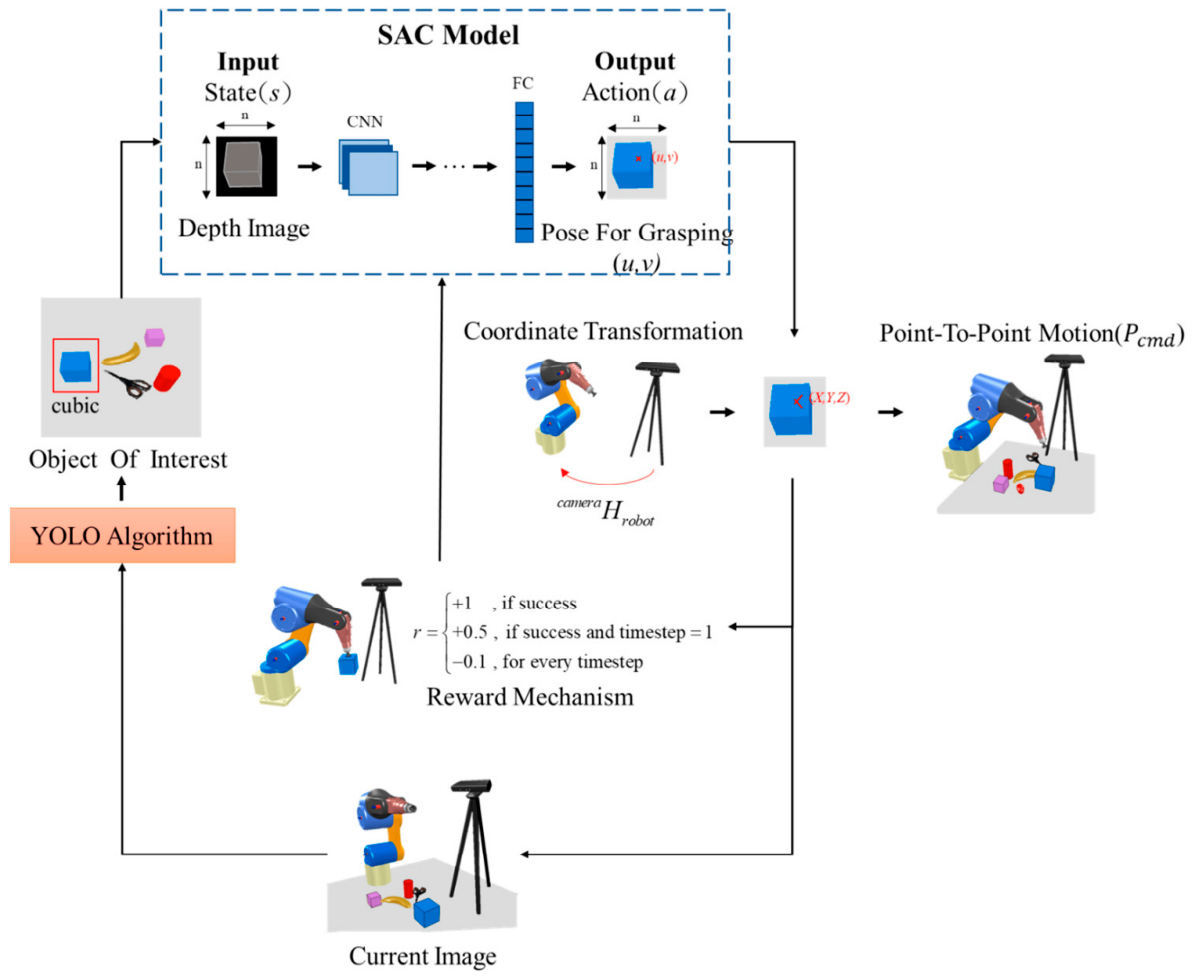

The framework figure for reference [74] is shown below:

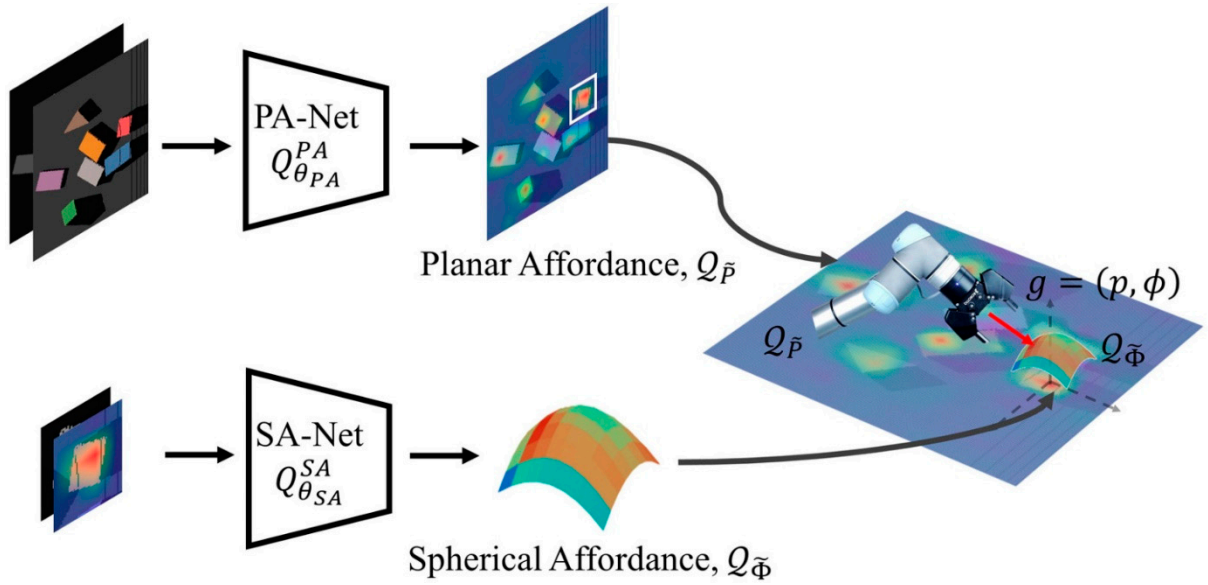

The framework figure for reference [75] is shown below:

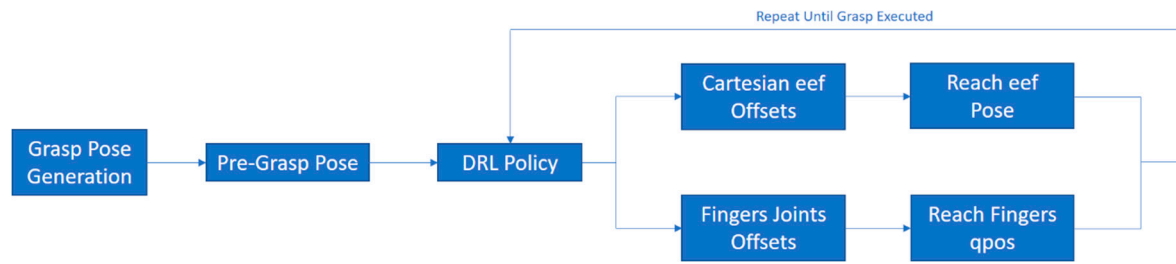

The framework figure for reference [76] is shown below:

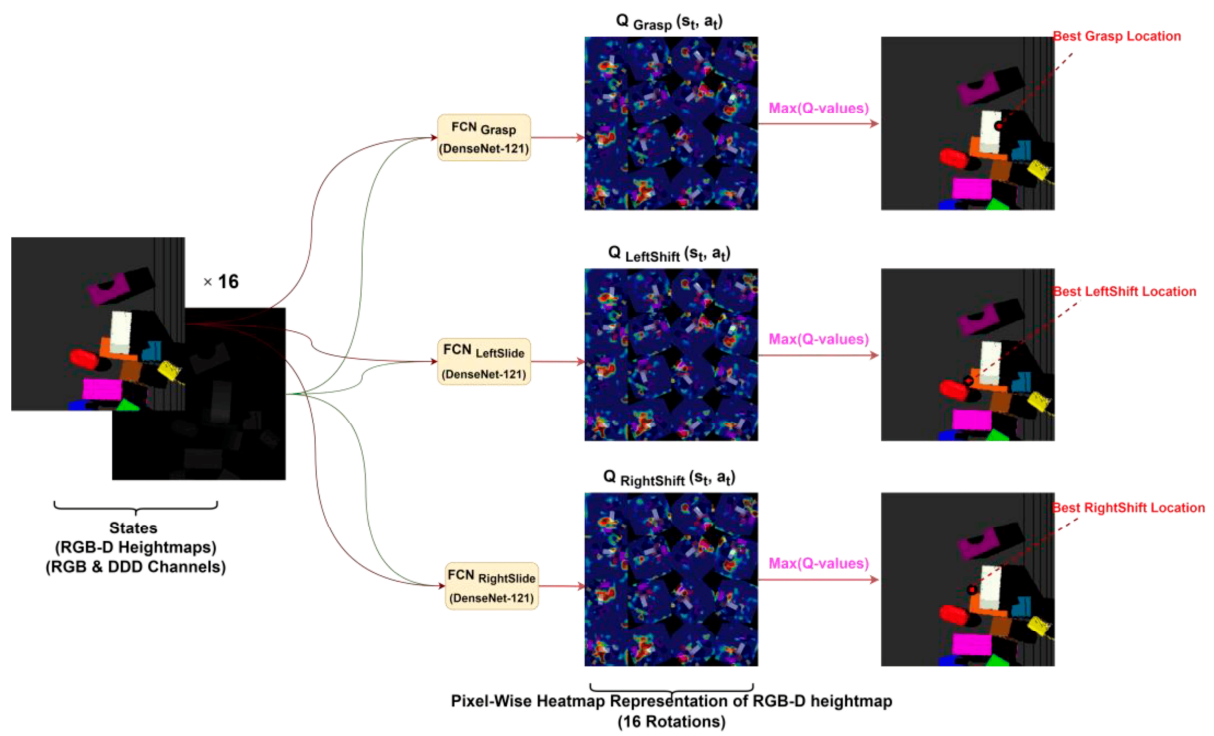

The framework figure for reference [77] is shown below:

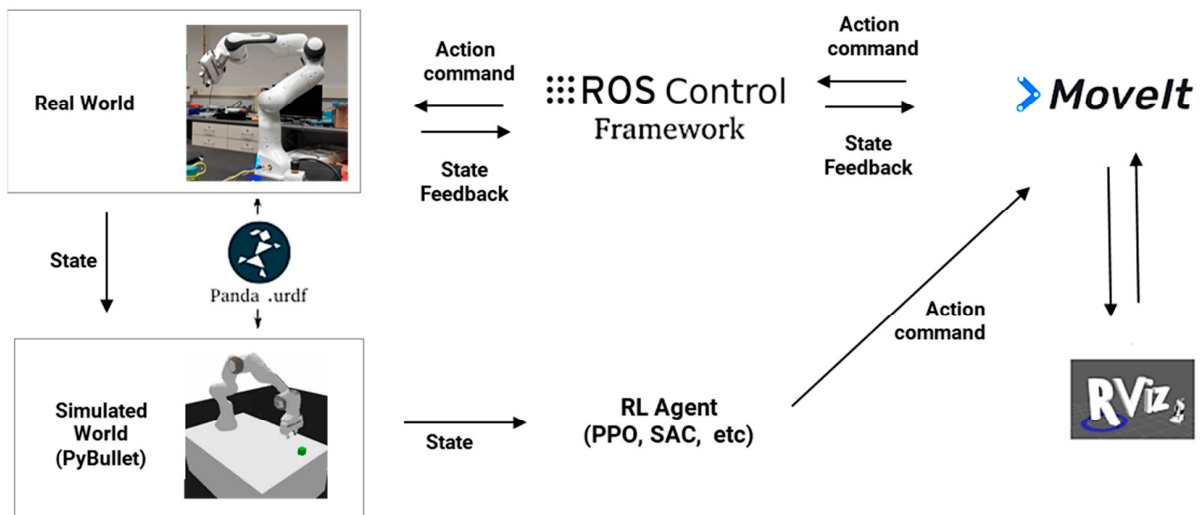

## References

68. G. Zuo, J. Tong, Z. Wang and D. Gong, "A Graph-Based Deep Reinforcement Learning Approach to Grasping Fully Occluded Objects," *Cognitive Computation*, vol. 15, p. pages36–49, 2022.
69. N. Liu, C. Guo, R. Liang and D. Li, "Collaborative Viewpoint Adjusting and Grasping via Deep Reinforcement Learning in Clutter Scenes," *Machines*, vol. 10, no. 12, 2022.
70. A. A. Shahid, D. Piga, F. Braghin and L. Roveda, "Continuous control actions learning and adaptation for robotic manipulation through reinforcement learning," *Autonomous Robots*, vol. 46, no. 3, p. 483–498, 2022.
71. O. Kilinc and G. Montana, "Reinforcement learning for robotic manipulation using simulated locomotion demonstrations," *Machine Learning*, vol. 111, p. 465–486, 2022.
72. M. Coskun, O. Yildirim and Y. Demir, "Robotic Grasping in Simulation Using Deep Reinforcement Learning," in *7th International Conference on Computer Science and Engineering (UBMK)*, Diyarbakir, Turkey, 2022.
73. Y.-L. Chen, Y.-R. Cai and M.-Y. Cheng, "Vision-Based Robotic Object Grasping—A Deep Reinforcement Learning Approach," *Machines*, vol. 11, no. 2, 2023.
74. Y. Hou and J. Li, "Learning 6-DoF grasping with dual-agent deep reinforcement learning," *Robotics and Autonomous Systems*, vol. 166, 2023.
75. F. Ceola, E. Maiettini, L. Rosasco and L. Natale, "A Grasp Pose is All You Need: Learning Multi-fingered Grasping with Deep Reinforcement Learning from Vision and Touch," *arXiv*, 2023.
76. M. B. Imtiaz, Y. Qiao and B. Lee, "Prehensile and Non-Prehensile Robotic Pick-and-Place of Objects in Clutter Using Deep Reinforcement Learning," *Sensors*, vol. 23, no. 3, 2023.
77. A. Lobbezoo and H.-J. Kwon, "Simulated and Real Robotic Reach, Grasp, and Pick-and-Place Using Combined Reinforcement Learning and Traditional Controls," *Robotics*, vol. 12, no. 1, 2023.
